# Supplementary material for: Assessing the Efficiency of Triangular Gold Nanoparticles as NIR Photothermal Agents In Vitro and Melanoma Tumor Model
Source: MDPI journal article supplement (doi:10.3390/ijms232213724), 2022-11-08
Supplement: s1 [file s1]

## Supplementary Materials

### Assessing the efficiency of triangular gold nanoparticles as NIR photothermal agents *in vitro* and melanoma tumor model

Sorina Suarasan<sup>a\*</sup>, Andreea Campu<sup>a</sup>, Adriana Vulpoi<sup>b</sup>, Manuela Banciu<sup>c</sup>, and Simion Astilean<sup>a,d</sup>

<sup>a</sup>Nanobiophotonics and Laser Microspectroscopy Center, Interdisciplinary Research Institute in Bio-Nano-Sciences, Babes-Bolyai University, T. Laurian Str. 42, 400271 Cluj-Napoca, Romania

<sup>b</sup>Nanostructured Materials and Bio-Nano-Interfaces Center, Interdisciplinary Research Institute in Bio-Nano-Sciences, Babes-Bolyai University, T. Laurian 42, 400271, Cluj-Napoca, Romania

<sup>c</sup>Department of Molecular Biology and Biotechnology, Center of Systems Biology, Biodiversity and Bioresources, Faculty of Biology and Geology, Babes-Bolyai University, Cluj-Napoca, Romania

<sup>d</sup>Department of Biomolecular Physics, Faculty of Physics, Babes-Bolyai University, M Kogalniceanu Str. 1, 400084 Cluj-Napoca, Romania

\*Corresponding author: sorina.suarasan@ubbcluj.ro

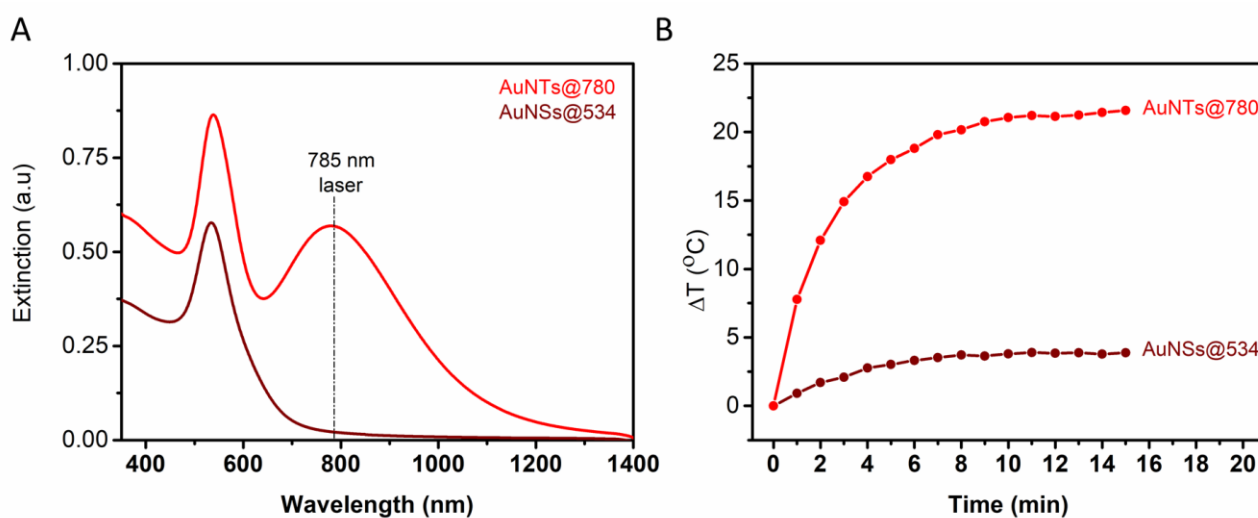

**Figure S1. A.** LSPR spectra of AuNTs@780 compared to AuNSs@534. **B.** The thermal curves recorded from AuNTs@780 and AuNSs irradiated by a 785 nm laser for 15 min

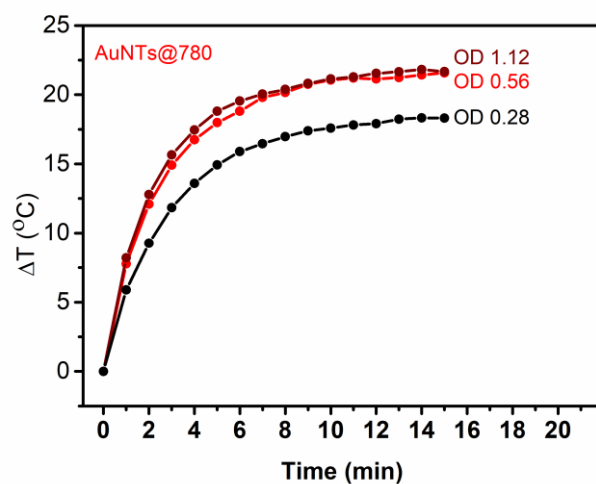

**Figure S2.** The AuNTs@780 thermal curves generated with regard to the variation of the optical density when irradiated in the same experimental conditions.

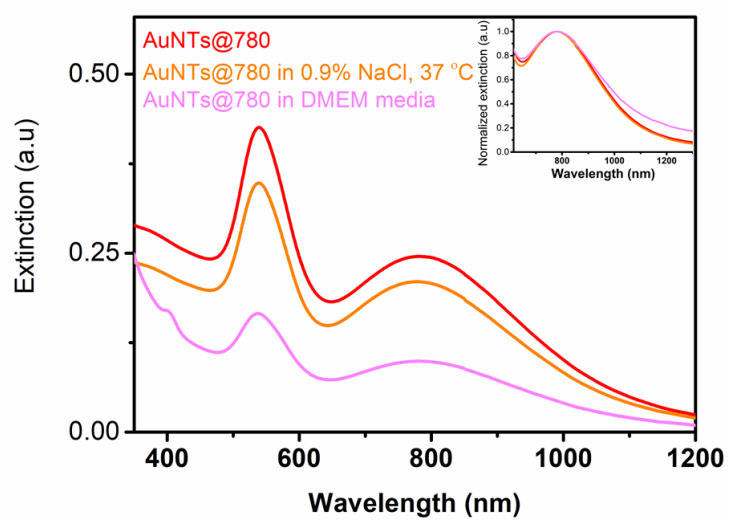

**Figure S3.** AuNTs stability in physiological conditions

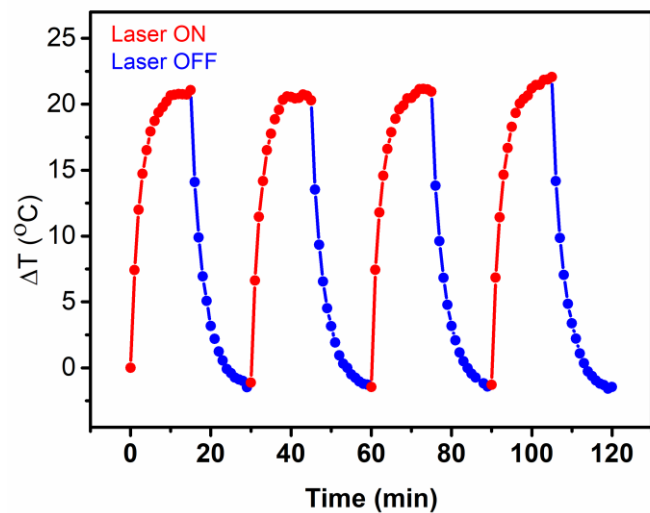

**Figure S4.** The stability of AuNTs inside biological phantoms after 4 NIR laser ON-OFF cycles.

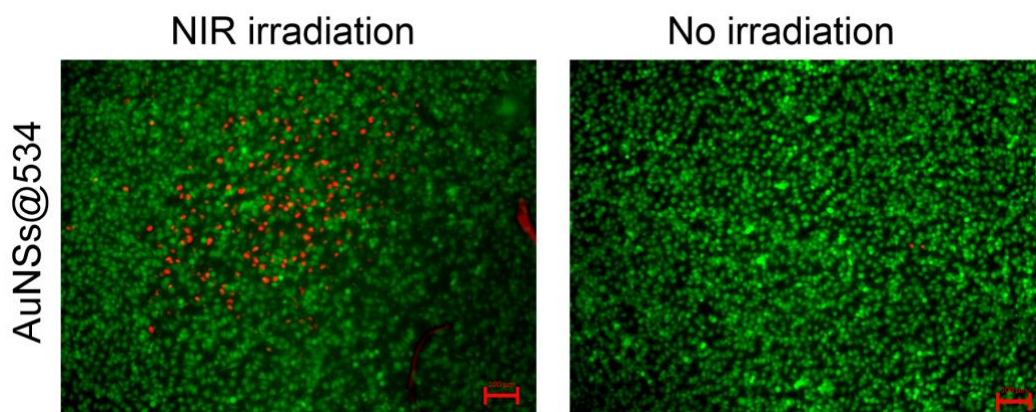

**Figure S5.** Merged fluorescence images of B16.F10 cells stained with calcein-AM and PI before and after NIR irradiation
